# Supplementary material for: Ideal strength and strain engineering of the Rashba effect in two-dimensional BiTeBr
Source: Royal Society of Chemistry journal article supplement (doi:10.1039/d0cp05890d), 2021-01-01
Supplement: d0cp05890d1.pdf [file d0cp05890d1.pdf]

## Supporting information

### Ideal Strength and Strain Engineering of Rashba Effect in Two-Dimensional BiTeBr

Wei Yang,<sup>a</sup> Zhizi Guan,<sup>a</sup> Hailong Wang,<sup>a,\*</sup> and Junwen Li<sup>b,\*</sup>

<sup>a</sup>CAS Key Laboratory of Mechanical Behavior and Design of Materials, Department of Modern Mechanics, CAS Center for Excellence in Complex System Mechanics, University of Science and Technology of China, Hefei, Anhui 230027, China

<sup>b</sup>DFTWorks LLC, Oakton, VA 22124, USA

To verify the stability calculation based on our stress-strain curve, we also carry out the calculations of elastic stiffness constants of BiTeBr monolayers. With the Born-Huang stability criteria as described by

$$C_{11} > 0, C_{22} > 0, C_{11} > |C_{12}|, C_{66} > 0,$$

we find these structures remain stable under the critical strain of 15% as listed in Tab. S1. This is in good agreement with the stress-strain curve in Fig. 2.

Tab. S1. Elastic Stiffness Constants of BiTeBr monolayer under the biaxial strain from 0 to 17%.

| Strain(%) | C <sub>11</sub> (N/m) | C <sub>12</sub> (N/m) | C <sub>22</sub> (N/m) | C <sub>66</sub> (N/m) |
|-----------|-----------------------|-----------------------|-----------------------|-----------------------|
| 0         | 28.612                | 7.224                 | 28.612                | 10.694                |
| 7         | 20.727                | 3.920                 | 20.727                | 8.403                 |
| 10        | 17.569                | 2.036                 | 17.569                | 7.767                 |
| 13        | 13.545                | 0.335                 | 13.545                | 6.605                 |
| 15        | 25.418                | 6.598                 | 25.418                | 9.410                 |
| 16        | -6.261                | 12.698                | -6.261                | -9.480                |
| 17        | -29.849               | 32.959                | -29.849               | -31.404               |

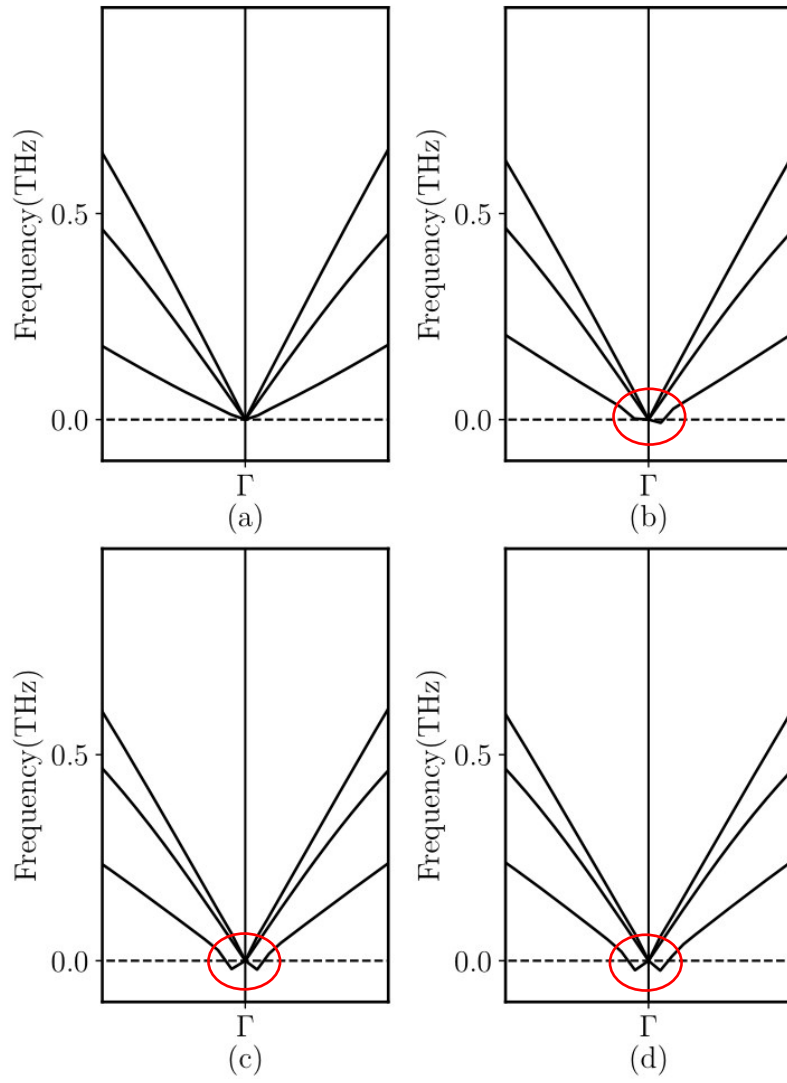

Fig. S1. The small virtual frequencies around  $\Gamma$  point in phonon spectra under a biaxial tensile strain (a)  $\epsilon = 0\%$ , (b)  $\epsilon = 3\%$ , (c)  $\epsilon = 7\%$  and (d)  $\epsilon = 8\%$ .

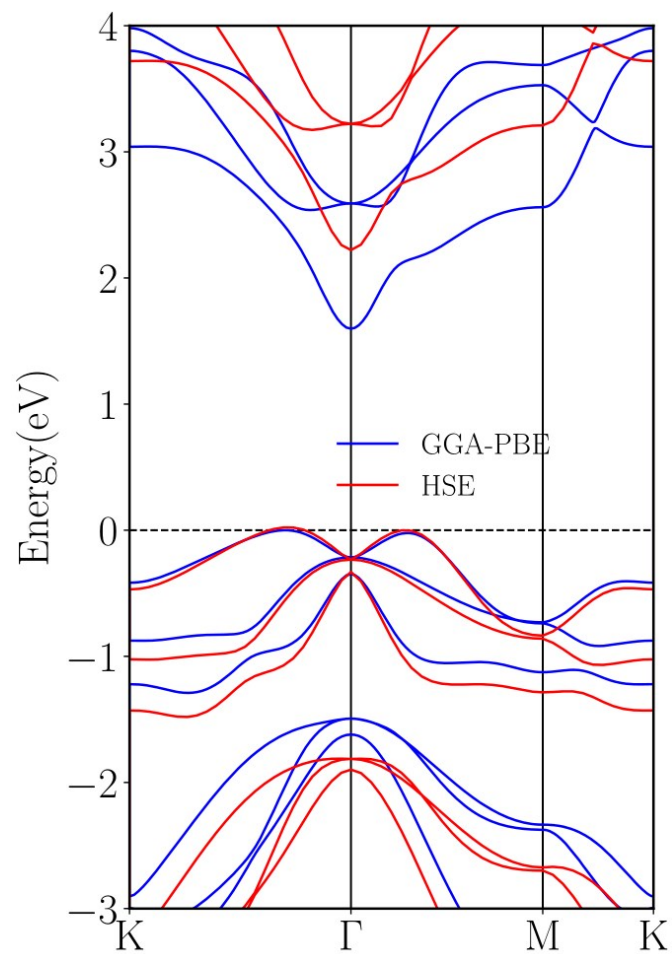

Fig. S2. Electronic band structures calculated using PBE (blue) and HSE06 (red) for a strain-free monolayer without considering spin-orbit coupling.

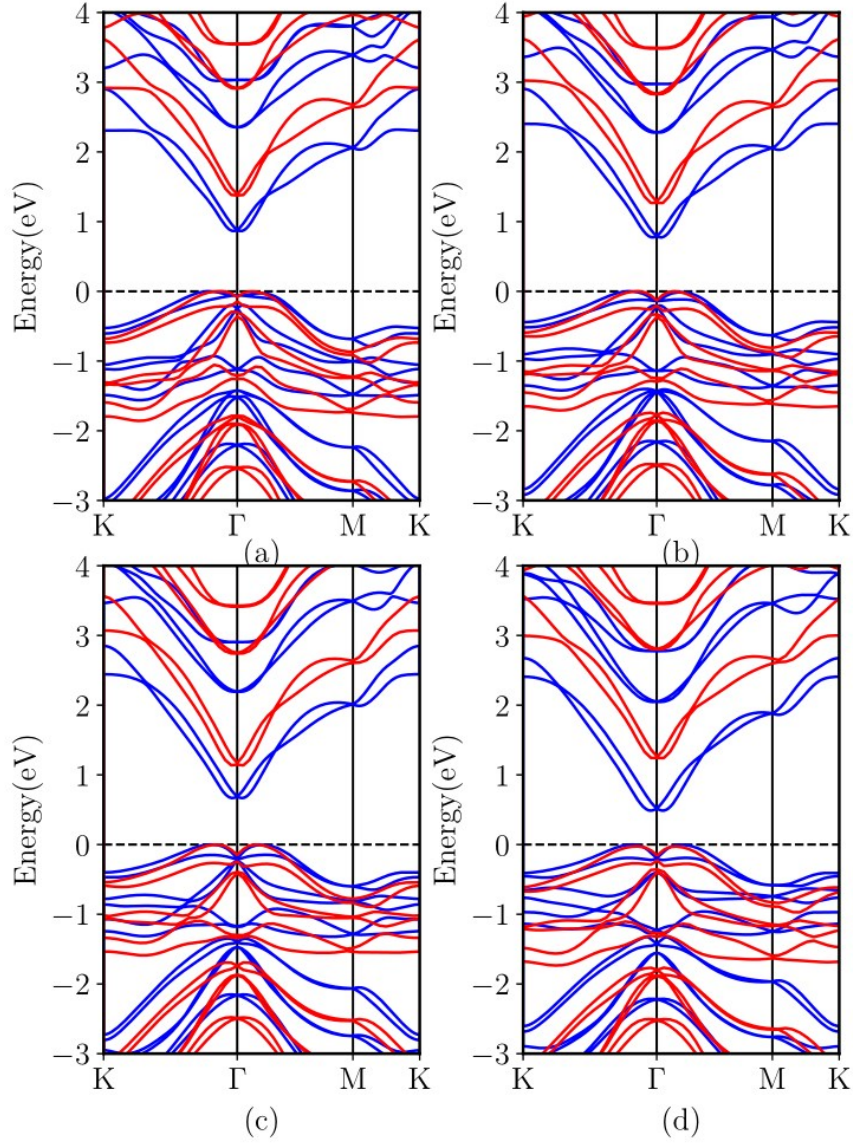

Fig. S3. Electronic band structures of BiTeBr monolayer using PBE (blue) and HSE06 (red) under the applied strain of (a) 0%, (b) 2%, (c) 4% and (d) 7% with spin-orbit coupling included.

Although the BiTeBr monolayer is mechanically stable and dynamically stable when the biaxial tensile strain less than 8%. Here we also present the dependencies of the characteristic parameters of the Rashba spin splitting on the strains in range of 0 to 15% as supplements.

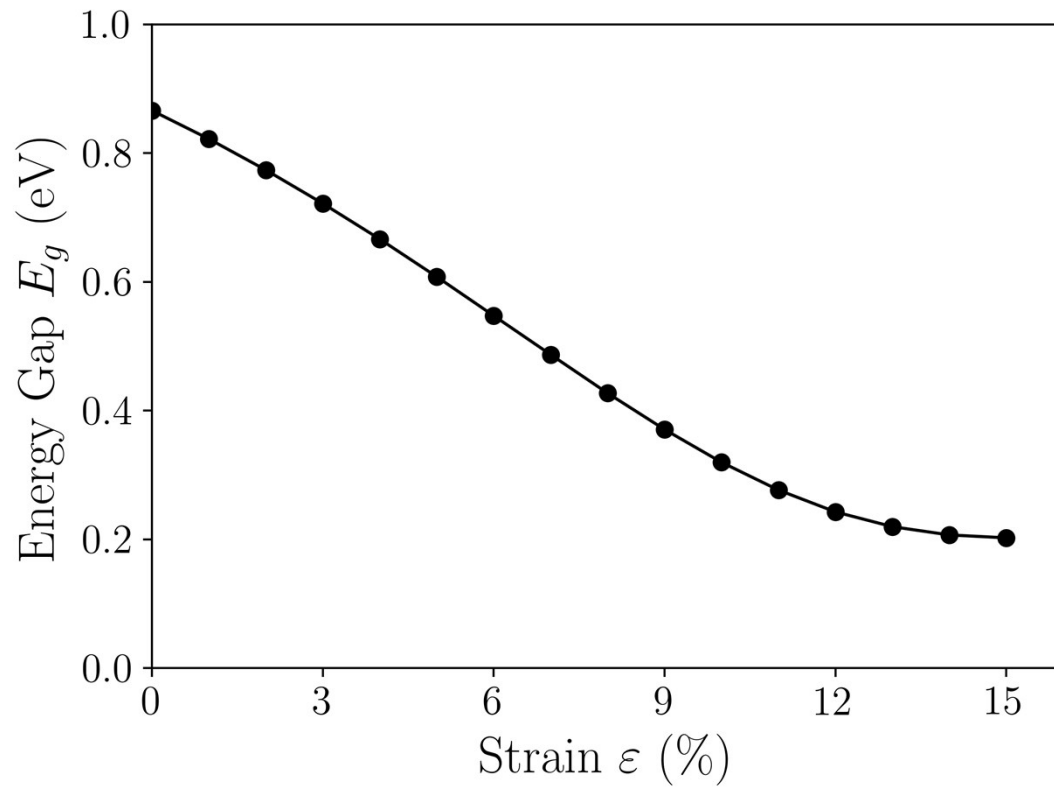

Fig. S4. The PBE energy gap  $E_g$  as a function of strain. The band structure demonstrates indirect band gap within the range of all strains.

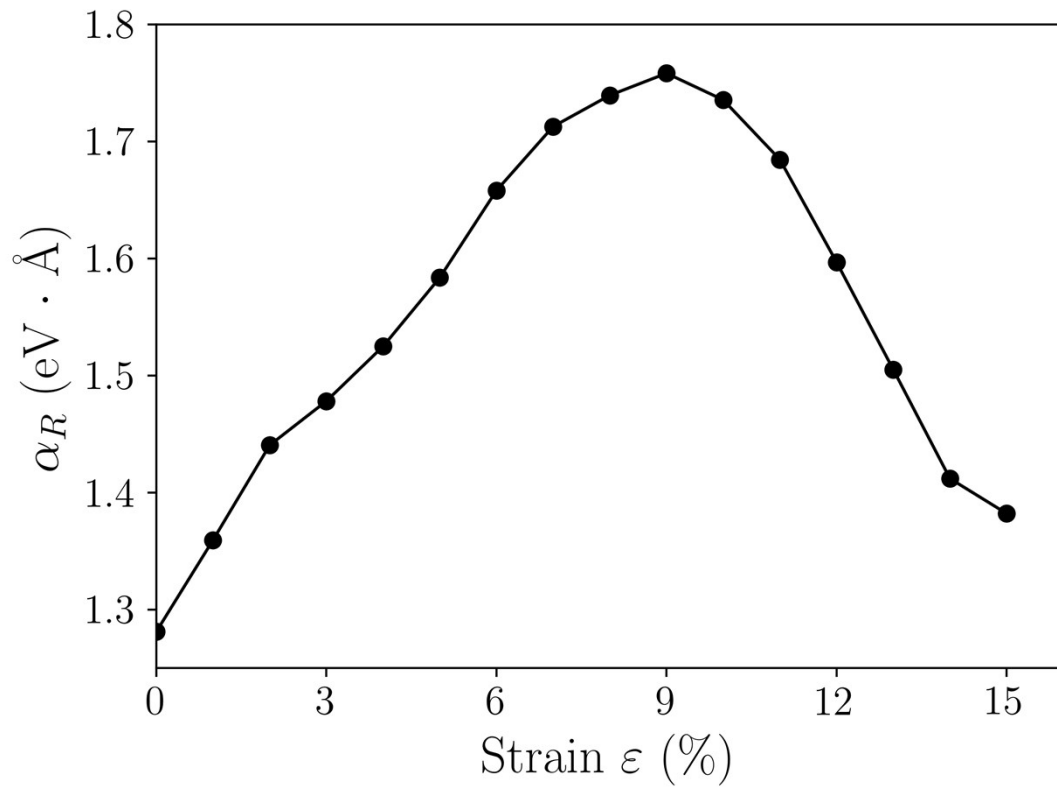

Fig. S5. The PBE Rashba parameter  $\alpha_R$  as a function of strain, calculated for the conduction band minimum around the  $\Gamma$  point.

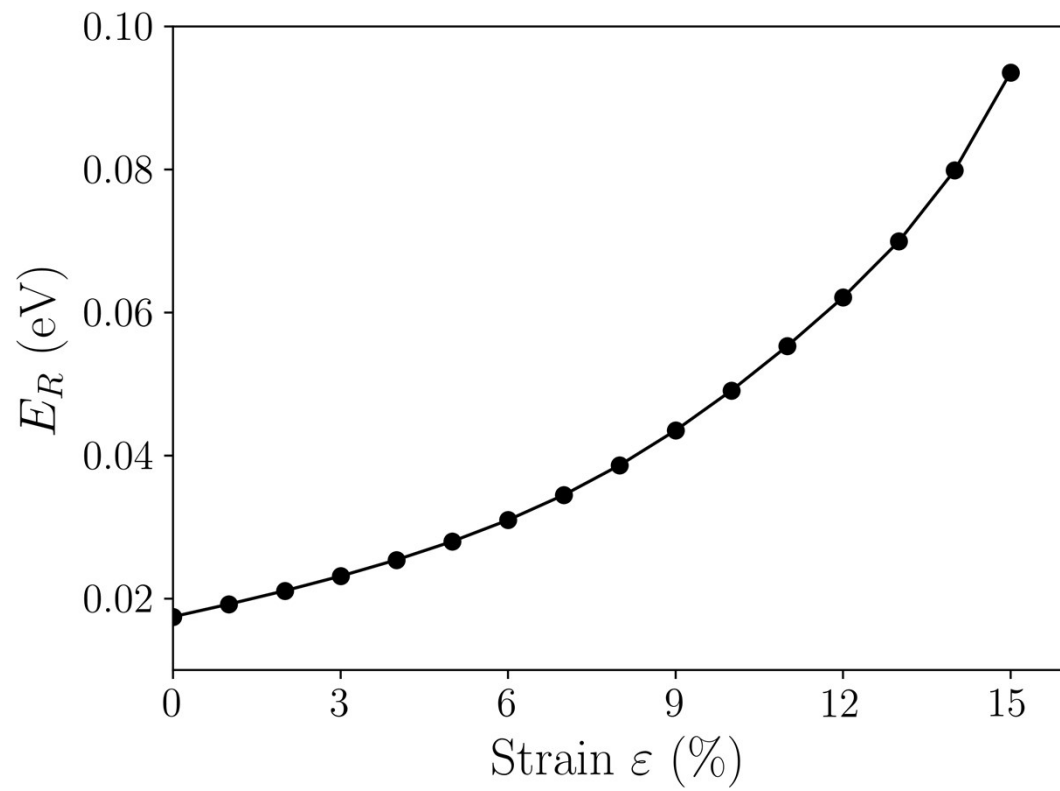

Fig. S6. The PBE Rashba Energy  $E_R$  as a function of strain, calculated for the conduction band minimum around the  $\Gamma$  point.

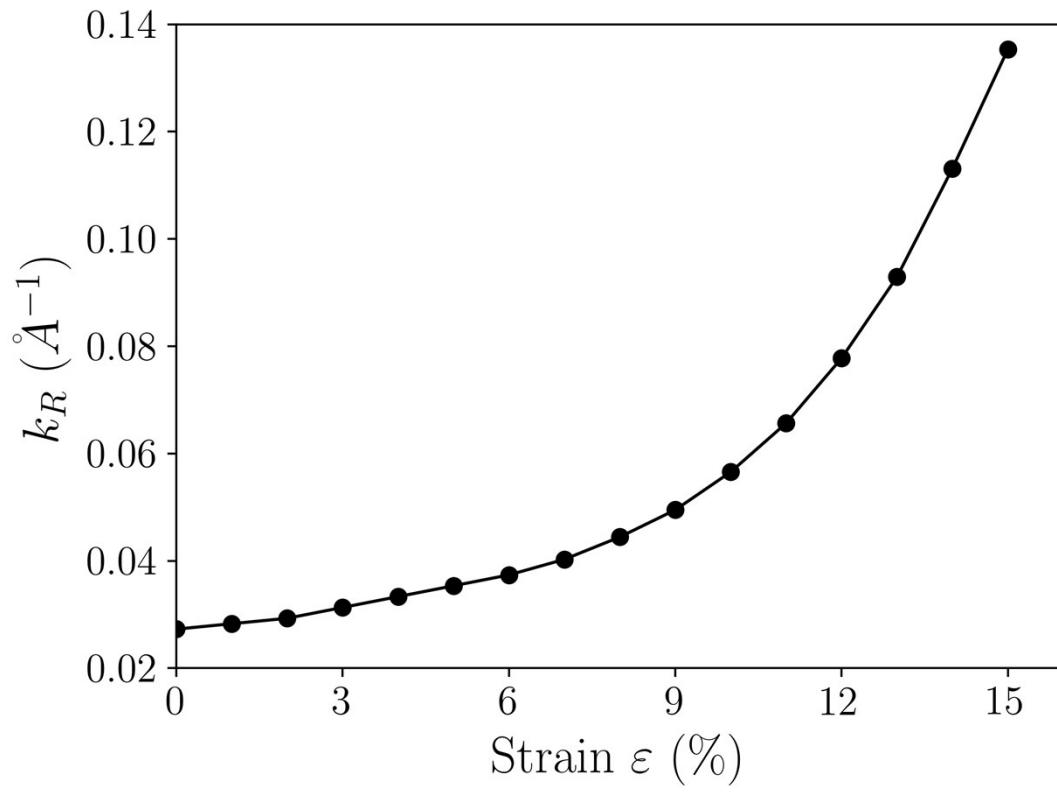

Fig. S7. The PBE momentum offset  $k_R$  as a function of strain, calculated for the conduction band minimum around the  $\Gamma$  point.
